# Supplementary figures and images for: Small-scale, long-duration, and biodegradable zinc–air batteries
Source: Royal Society of Chemistry journal article supplement (doi:10.1039/d5eb00032g), 2025-01-01

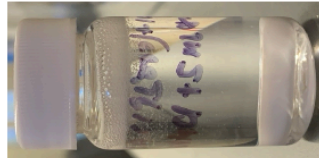

Precursor

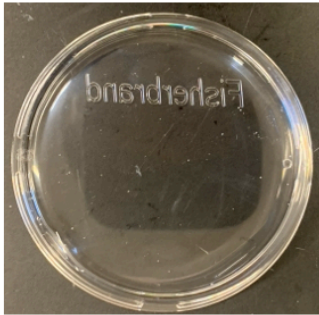

Cast onto petri dish

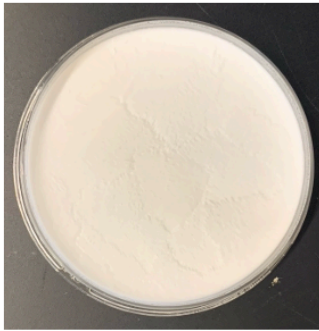

Frozen

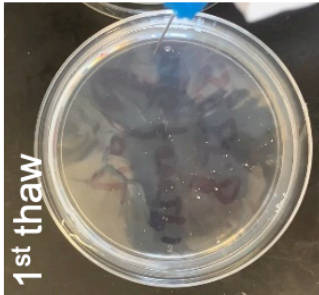

Viscous

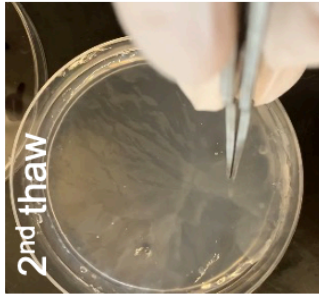

Sticky

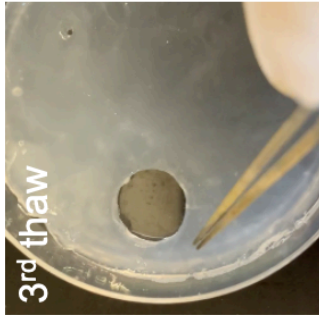

Soft

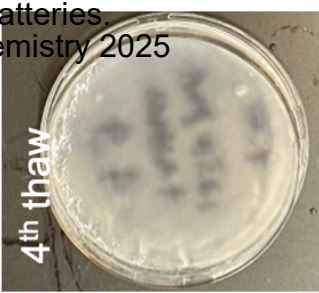

Rubbery

Supplement: d5eb00032g1.pdf [file d5eb00032g1.pdf]

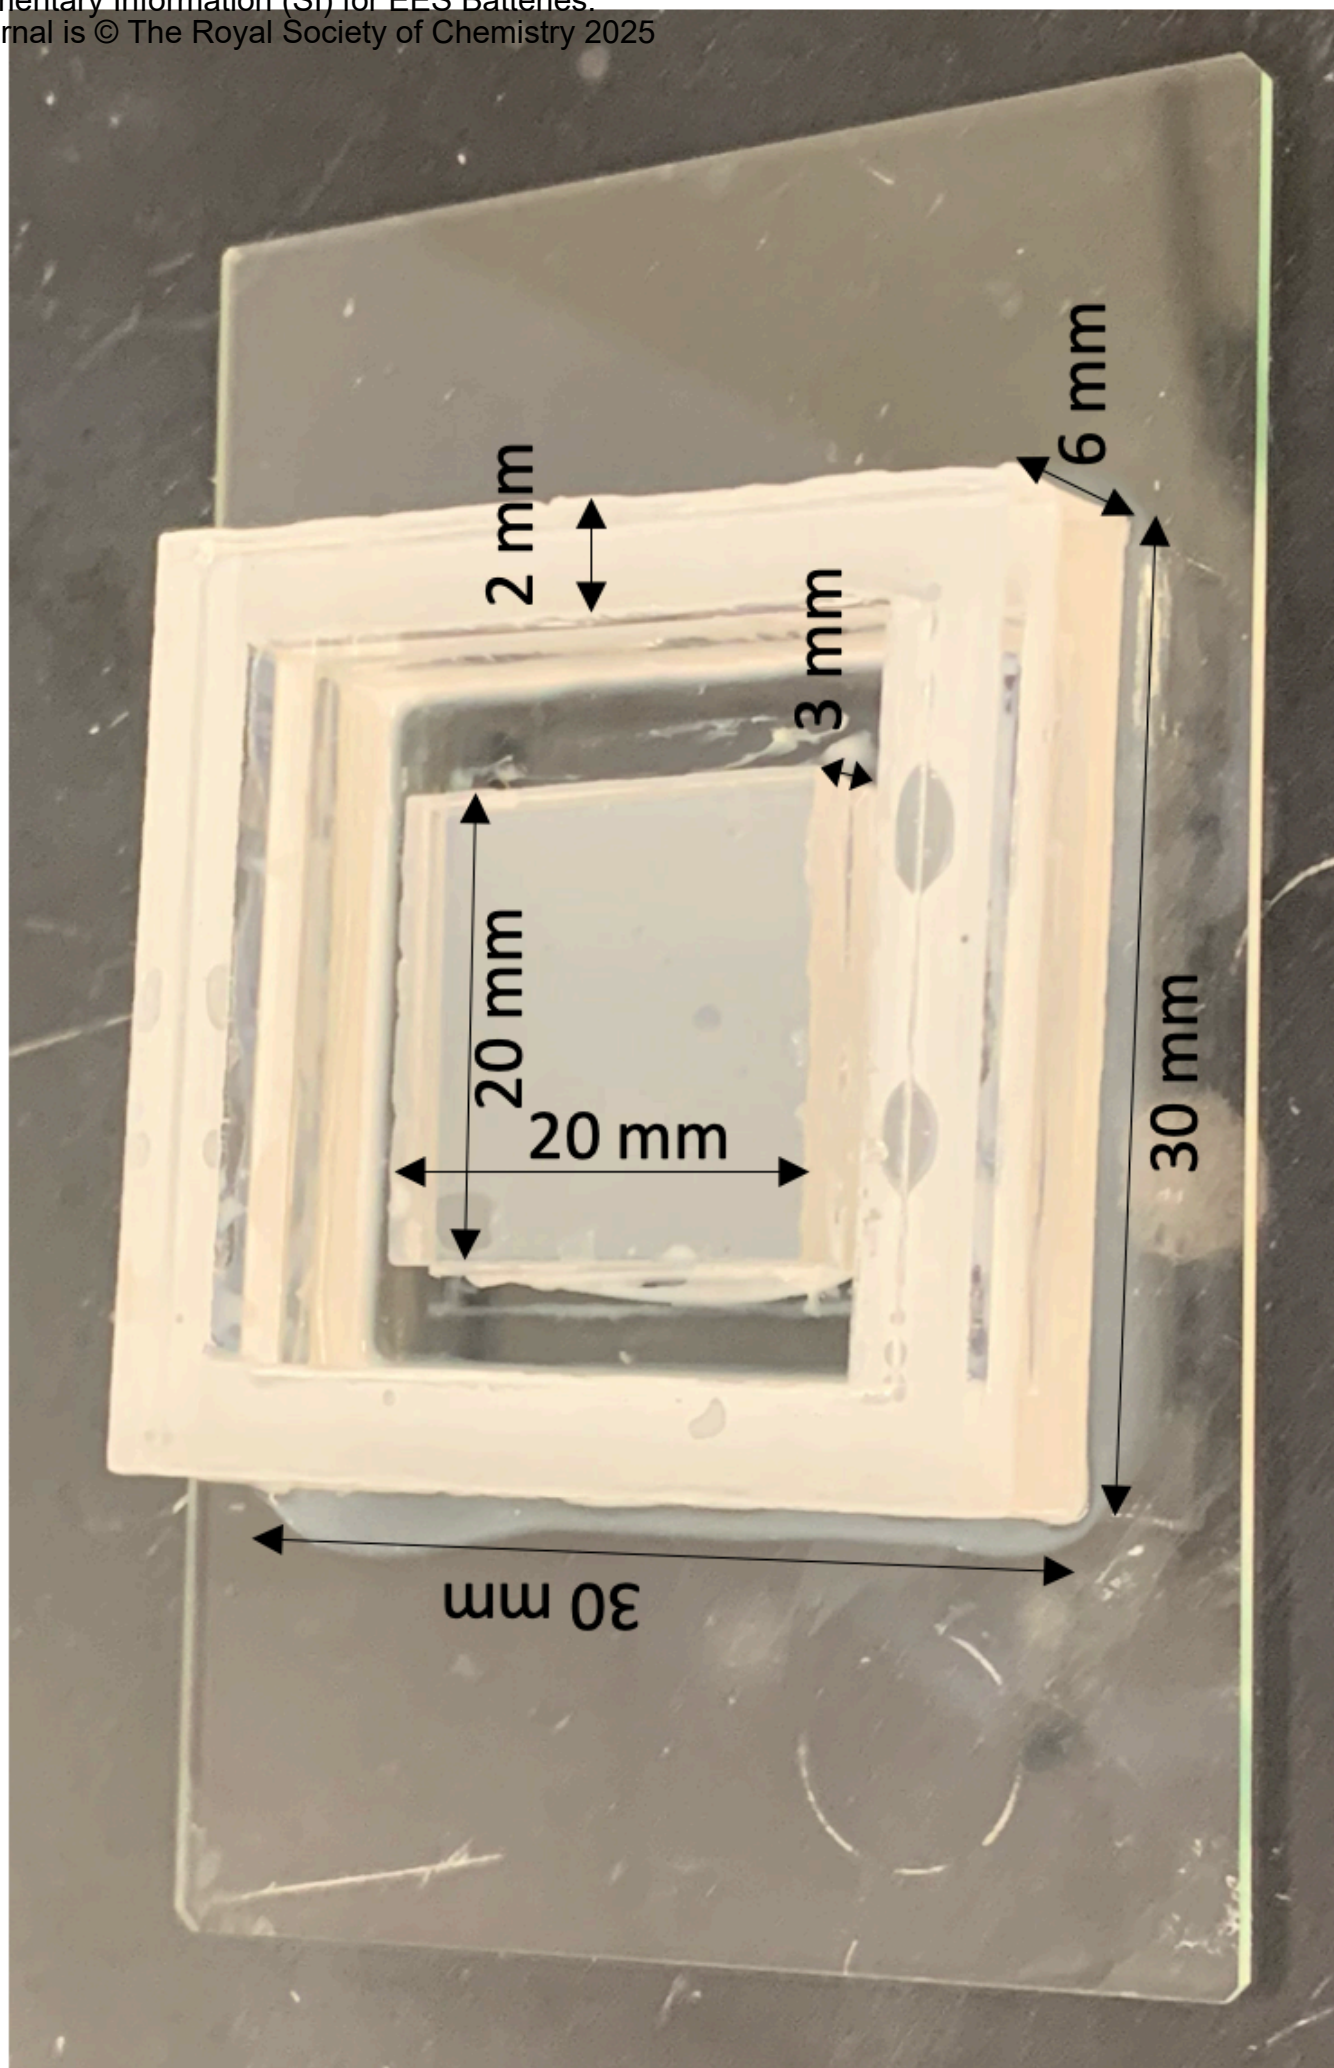

Supplement: d5eb00032g2.pdf [file d5eb00032g2.pdf]

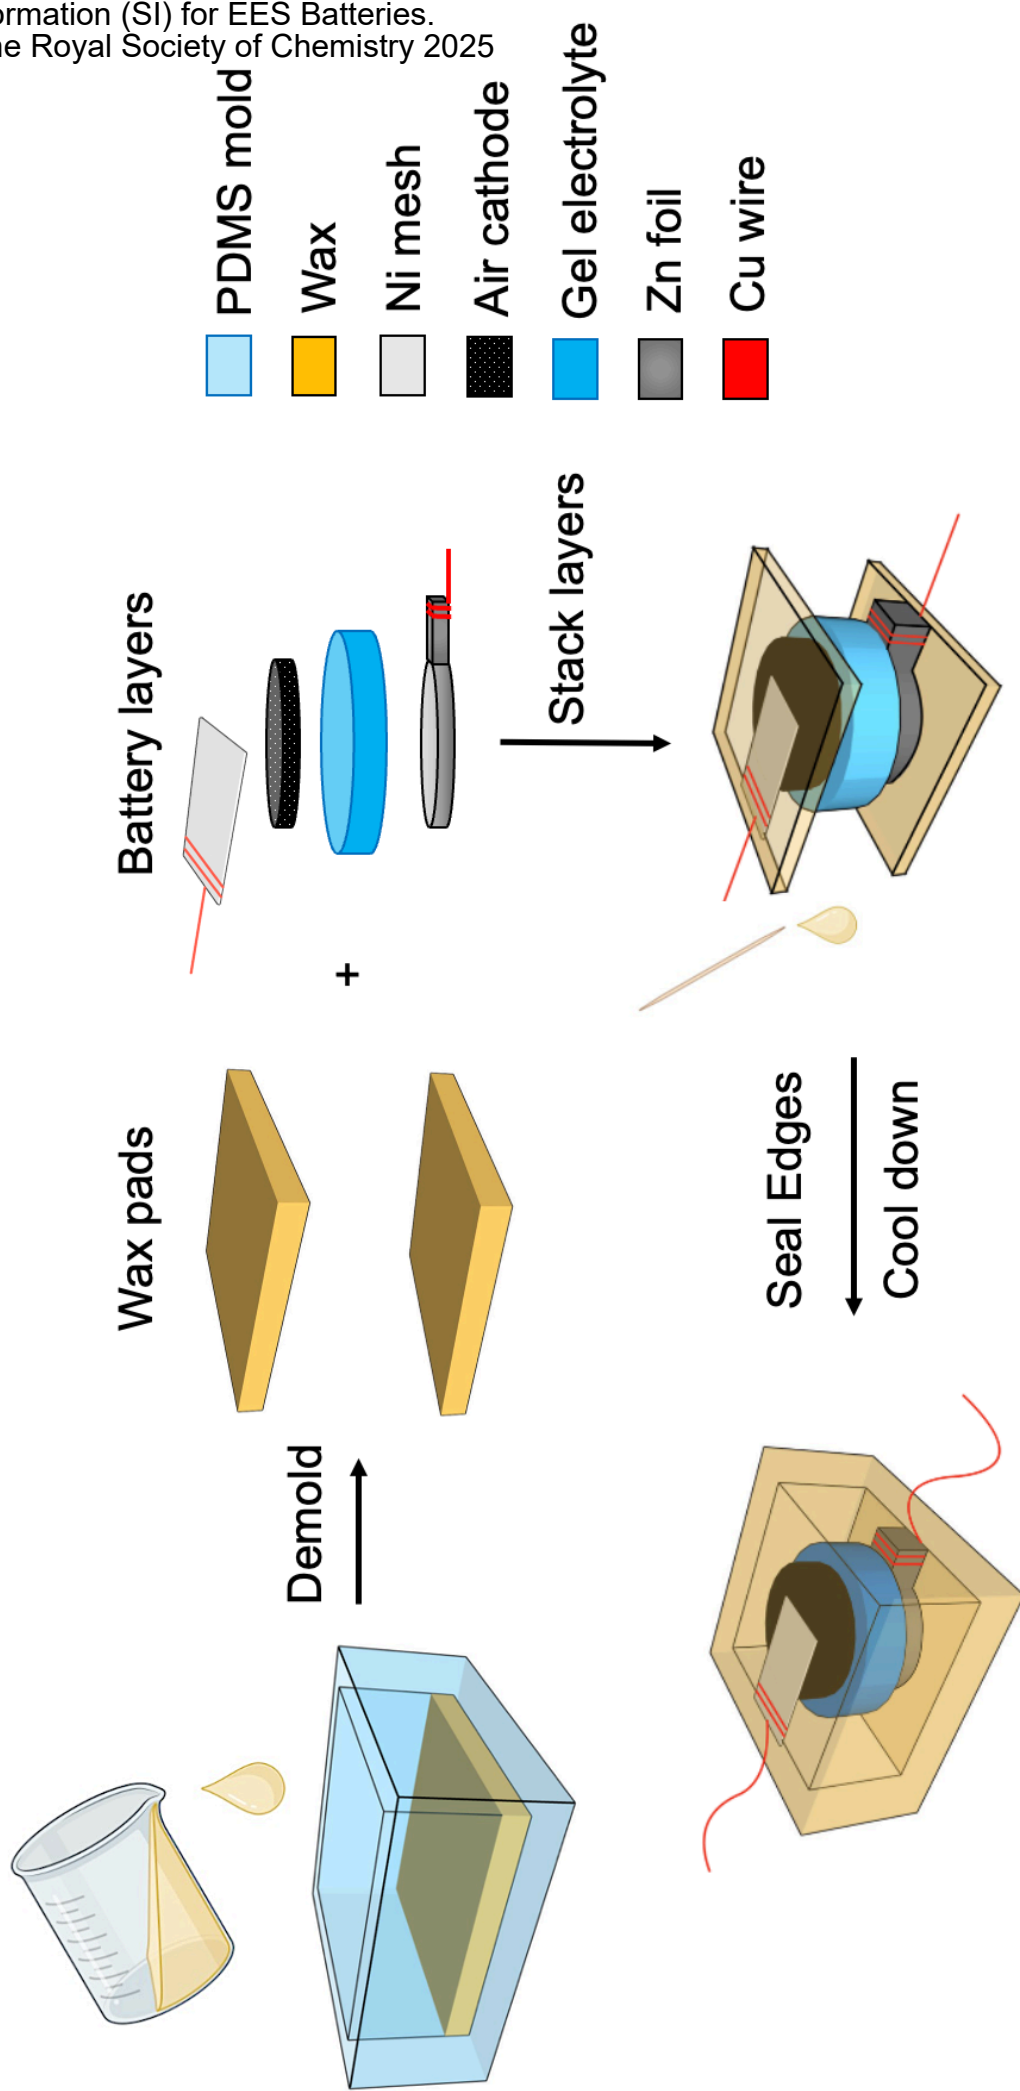

Supplement: d5eb00032g3.pdf [file d5eb00032g3.pdf]

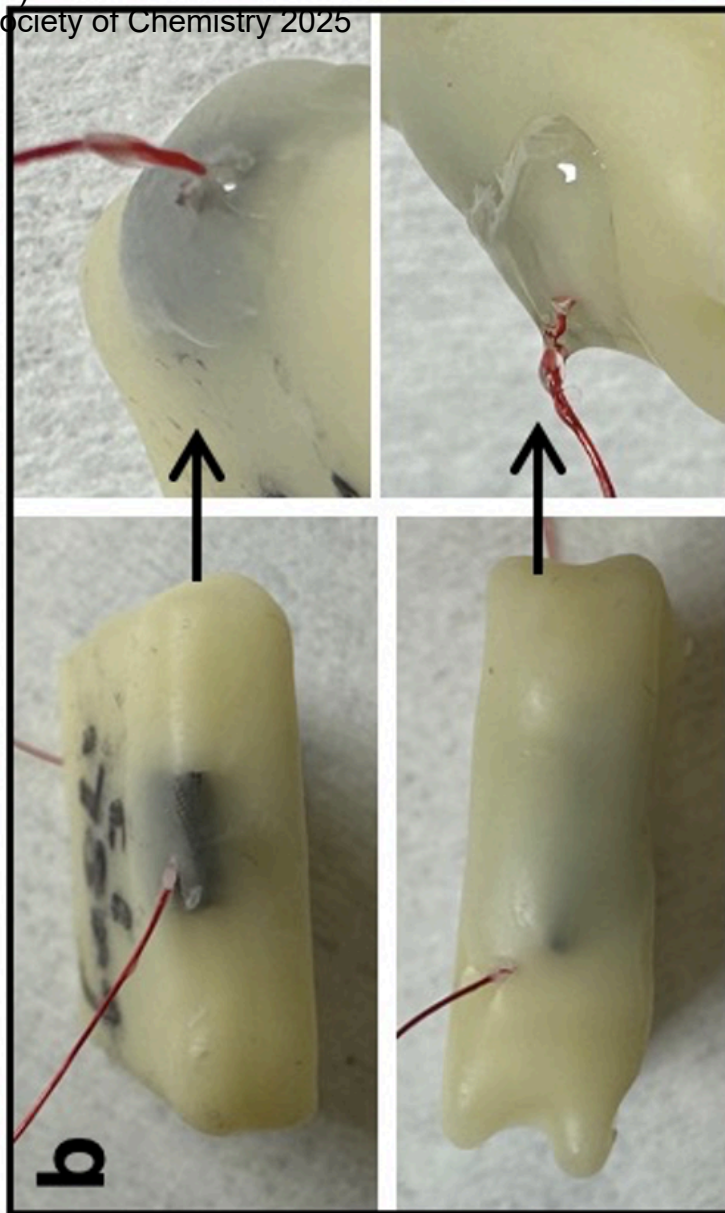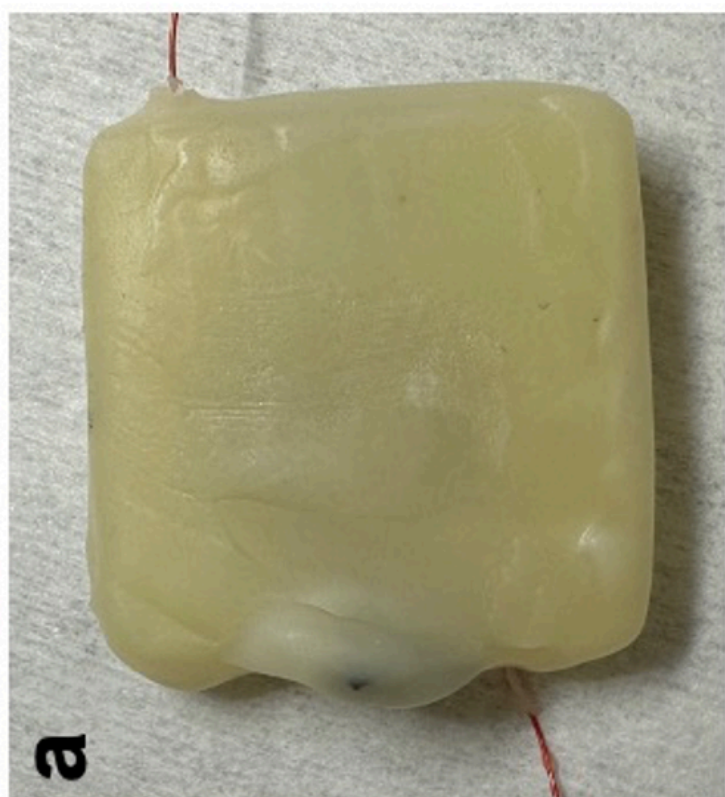

Supplement: d5eb00032g4.pdf [file d5eb00032g4.pdf]

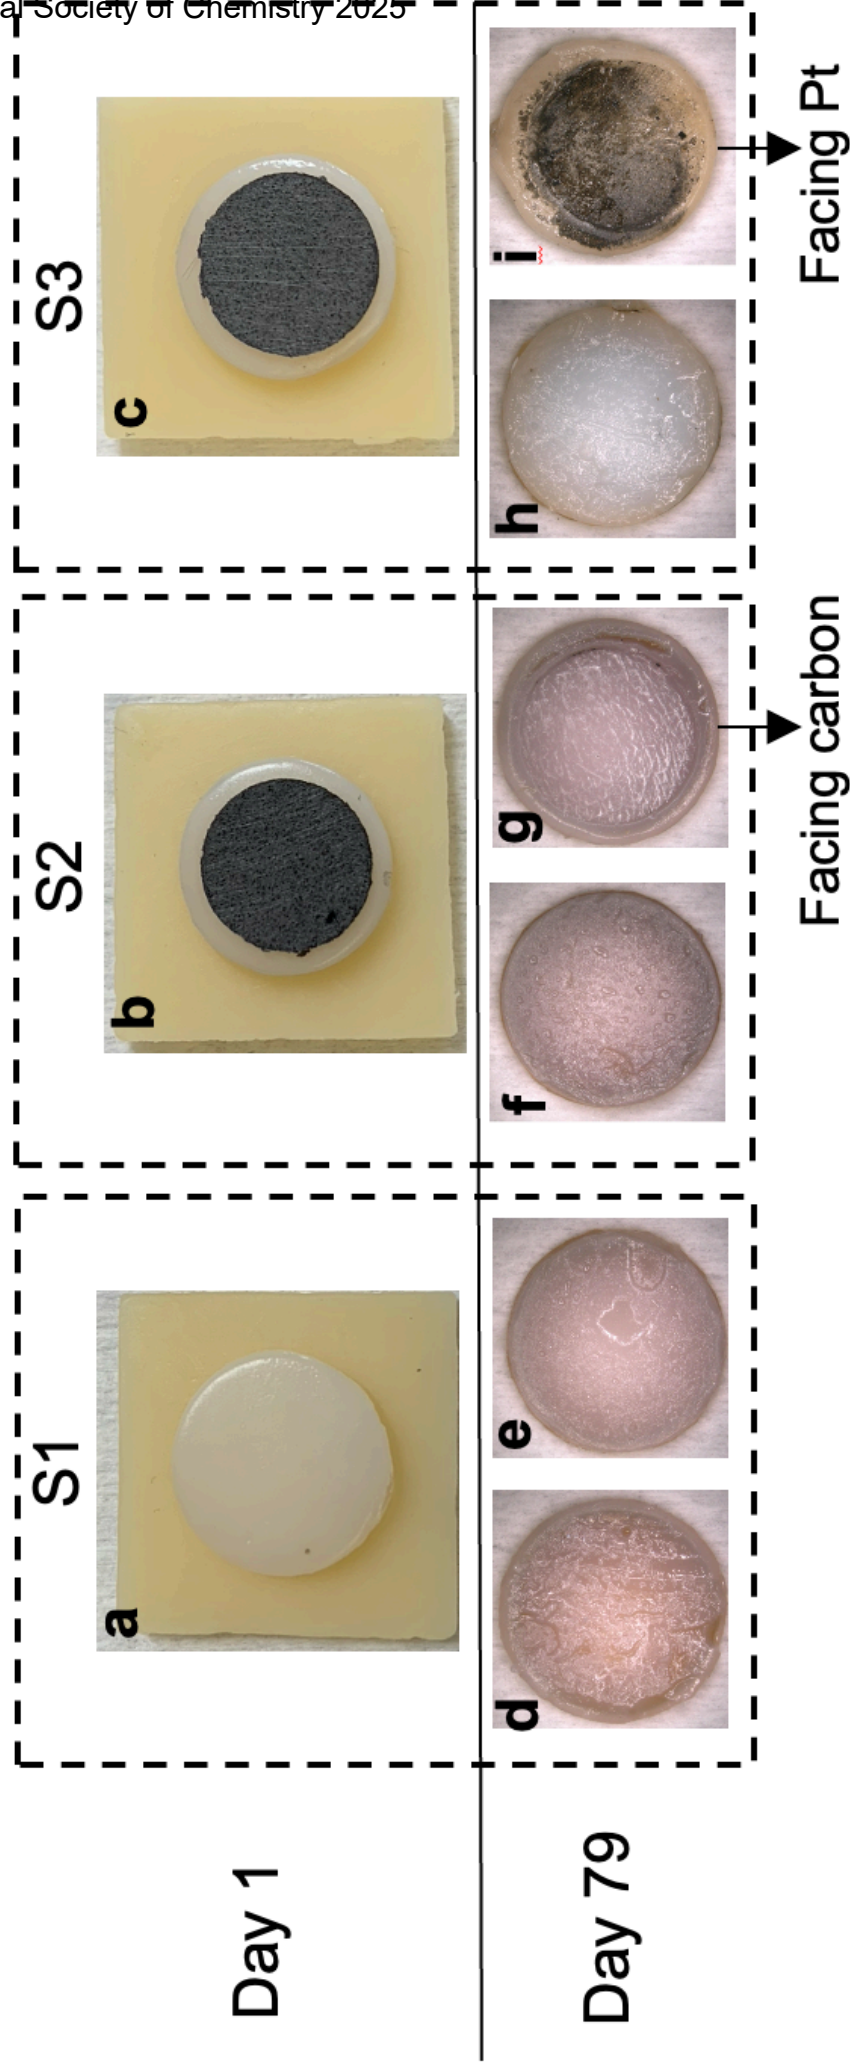

Supplement: d5eb00032g6.pdf [file d5eb00032g6.pdf]

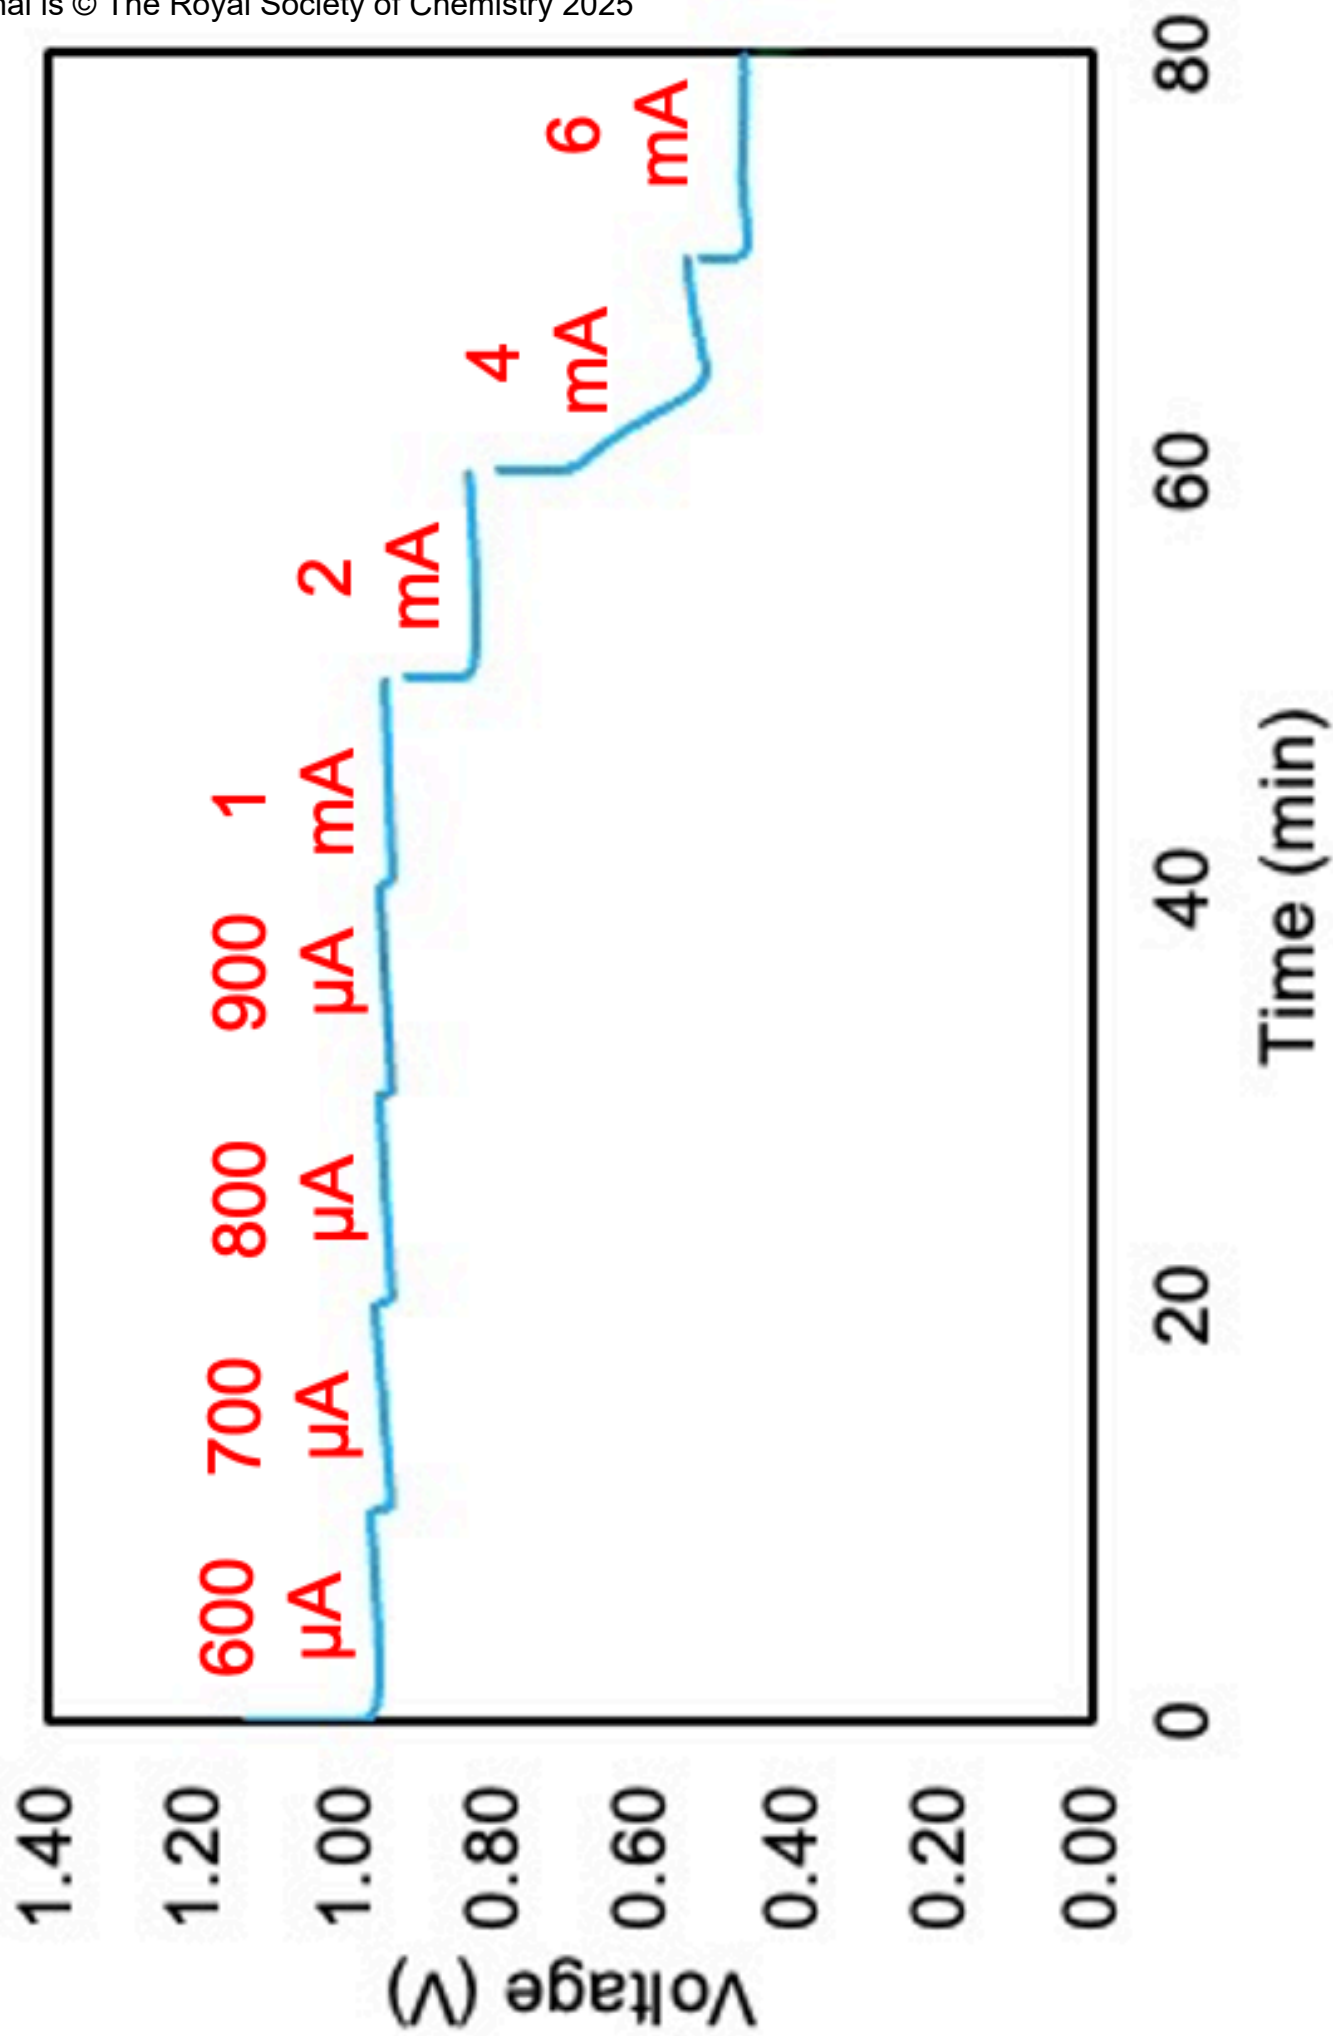

Supplement: d5eb00032g7.pdf [file d5eb00032g7.pdf]

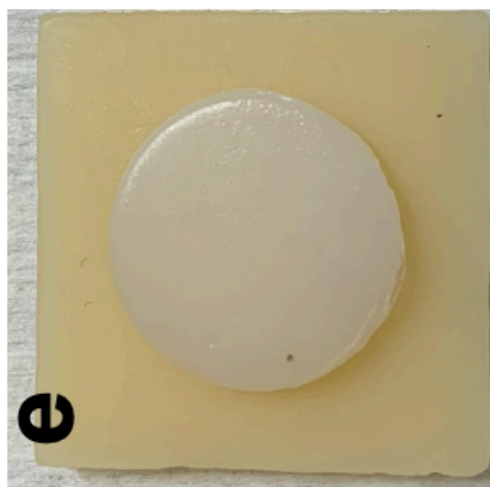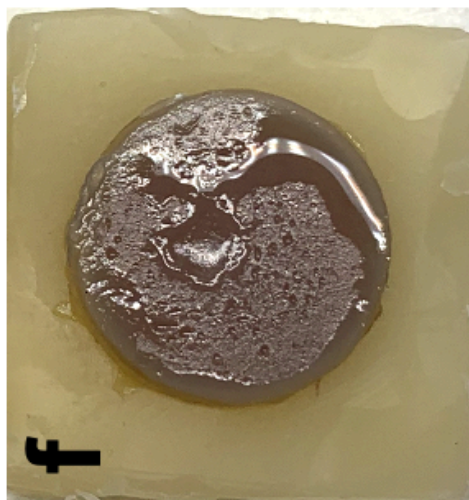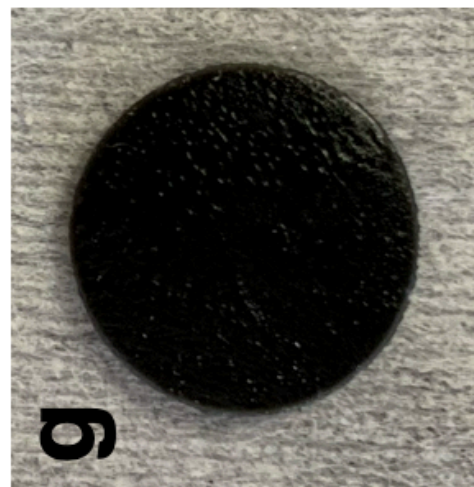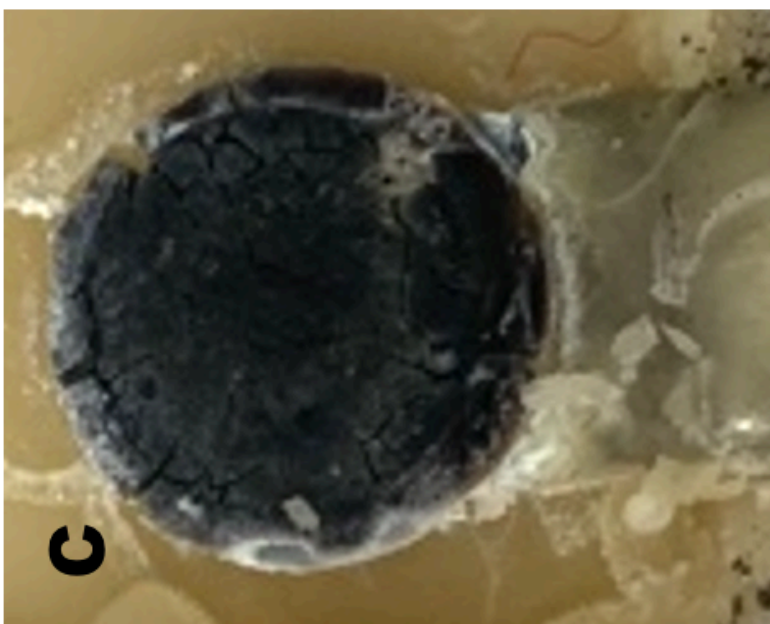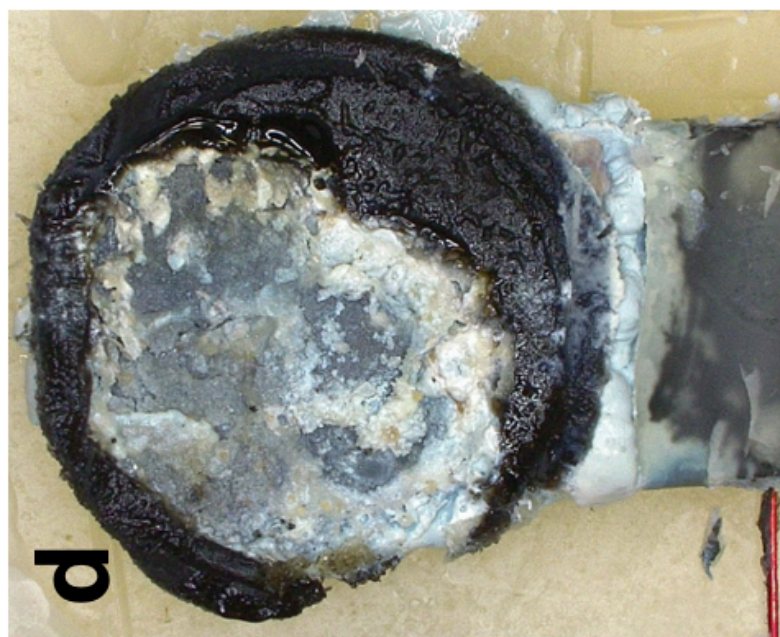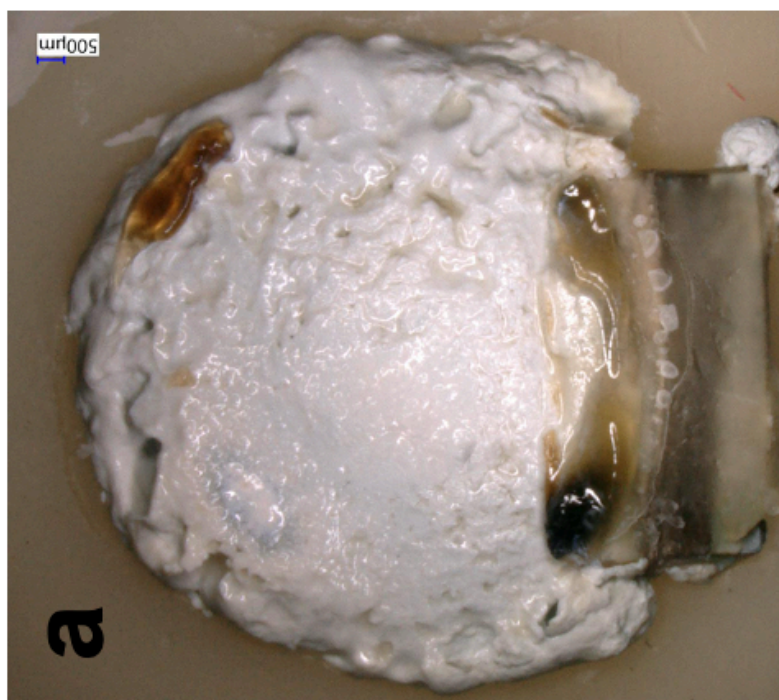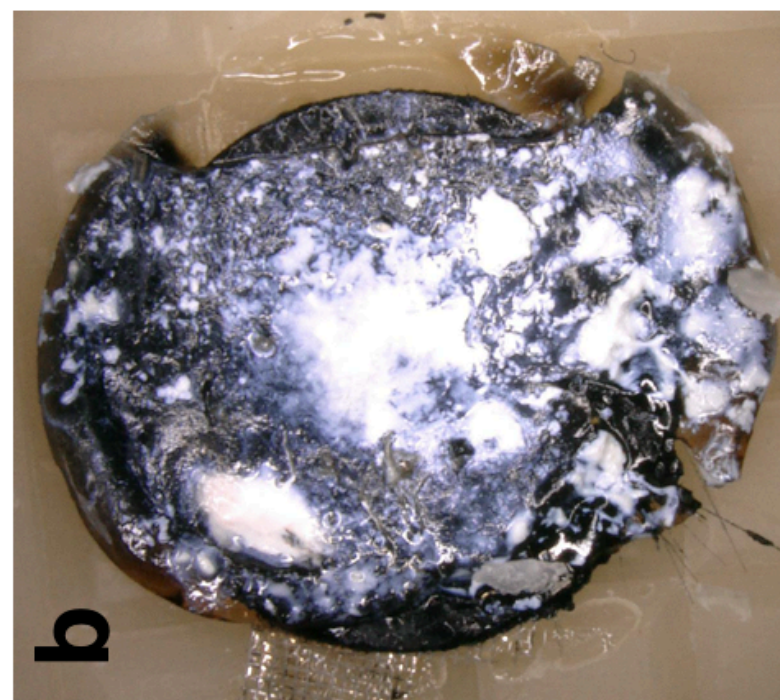

Supplement: d5eb00032g9.pdf [file d5eb00032g9.pdf]
